# Supplementary material
Source: HighWire-hosted journal article supplement (https://bmjopen.bmj.com/content/6/8/e011049)
Supplement: inline-supplementary-material-1 [file inline-supplementary-material-1.pdf]

|                                         |                        |                                                    |                                               |                       |                       |                          |                                                                                                 |                                                        |                                               |                          |                                      |                                                              |
|-----------------------------------------|------------------------|----------------------------------------------------|-----------------------------------------------|-----------------------|-----------------------|--------------------------|-------------------------------------------------------------------------------------------------|--------------------------------------------------------|-----------------------------------------------|--------------------------|--------------------------------------|--------------------------------------------------------------|
| A.<br>Poly<br>substance<br>use<br>Y/N/U | B.<br>I/V use<br>Y/N/U | C.<br>Suicidal<br>ideation or<br>intent<br>Y/N/U/P | D.<br>Changes in<br>level of<br>consciousness | 1.0<br>Opiates<br>Y/N | 1.1.<br>Heroin<br>Y/N | 1.2.<br>methadone<br>Y/N | 1.3.<br>Coedine<br>(DF118,<br>Dihydrocodin<br>Paracodol,<br>Co-Codamol,<br>Solpadine<br>etc Y/N | 1.5.<br>Buprenorphine<br>(subutex,<br>tramadol)<br>Y/N | 1.6.<br>Morphine<br>(oramorph,<br>MST)<br>Y/N | 2.0<br>Stimulants<br>Y/N | 2.1. Cocaine<br>(incl. crack)<br>Y/N | 2.2.<br>Amphetamine<br>(speed, base,<br>crystal meth)<br>Y/N |
|-----------------------------------------|------------------------|----------------------------------------------------|-----------------------------------------------|-----------------------|-----------------------|--------------------------|-------------------------------------------------------------------------------------------------|--------------------------------------------------------|-----------------------------------------------|--------------------------|--------------------------------------|--------------------------------------------------------------|

Coding for Box 1 data: Recreational substance misuse O/D V2 CB 05/03/09

|                          |                       |                                                                             |                            |                                               |                        |                       |                       |                                 |                                        |                                          |                                                                |
|--------------------------|-----------------------|-----------------------------------------------------------------------------|----------------------------|-----------------------------------------------|------------------------|-----------------------|-----------------------|---------------------------------|----------------------------------------|------------------------------------------|----------------------------------------------------------------|
| 3.0<br>Sedative<br>s Y/N | 3.1<br>Alcohol<br>Y/N | 3.2<br>Benzos<br>(diazepam,<br>zopiclone,<br>temazepam<br>lorazepam)<br>Y/N | 3.3<br>Barbiturates<br>Y/N | 3.4<br>Solvents (glue,<br>aerosol etc)<br>Y/N | 3.5<br>Ketamine<br>Y/N | 3.6<br>GHB/GBL<br>Y/N | 3.7<br>Poppers<br>Y/N | 4.0<br>Ecstasy<br>(MDMA)<br>Y/N | 5.0<br>Cannabis<br>(Marajuanna)<br>Y/N | 6.0<br>Prescribed<br>medication<br>Y/N/S | 6.1<br>Antipsychotics<br>(olanzapine, quetiapine<br>etc<br>Y/N |
|--------------------------|-----------------------|-----------------------------------------------------------------------------|----------------------------|-----------------------------------------------|------------------------|-----------------------|-----------------------|---------------------------------|----------------------------------------|------------------------------------------|----------------------------------------------------------------|

|                                                                       |                                                               |                                                 |                                   |                            |                         |                       |                          |                                                                                         |                     |                       |
|-----------------------------------------------------------------------|---------------------------------------------------------------|-------------------------------------------------|-----------------------------------|----------------------------|-------------------------|-----------------------|--------------------------|-----------------------------------------------------------------------------------------|---------------------|-----------------------|
| 6.2<br>Antidepressants (fluoxetine,<br>mirtazepine, citalopram<br>Y/N | 6.3<br>Antiepileptics<br>(sodium valproate,<br>epilim)<br>Y/N | 6.4<br>Other<br>Prescribed<br>medication<br>Y/N | 7.0<br>Over the<br>Counter<br>Y/N | 7.1<br>Paracetamol,<br>Y/N | 7.2<br>Ibuprofen<br>Y/N | 7.3<br>Aspirin<br>Y/N | 7.4<br>Diclofenac<br>Y/N | 7.5<br>Other Over the<br>Counter eg (Cold<br>remedies, night<br>nurse, beechams)<br>Y/N | 8.0<br>Other<br>Y/N | 9.0<br>Unknown<br>Y/N |
|-----------------------------------------------------------------------|---------------------------------------------------------------|-------------------------------------------------|-----------------------------------|----------------------------|-------------------------|-----------------------|--------------------------|-----------------------------------------------------------------------------------------|---------------------|-----------------------|

|                       |                                               |
|-----------------------|-----------------------------------------------|
| 10.0<br>Police<br>Y/N | 11.0<br>Violent/ aggressive behaviour<br>Y/ N |
|-----------------------|-----------------------------------------------|
