# Supplementary material
Source: HighWire-hosted journal article supplement (https://bmjopen.bmj.com/content/6/8/e011049)
Supplement: inline-supplementary-material-2 [file inline-supplementary-material-2.pdf]

### CLINICAL RECORD IN CONFIDENCE

DATE  /  /  INC No  NHS CODE

#### 1. PATIENT DETAILS

NAME  SURNAME  SEX  AGE

PHYSICIAN  G.P.  AMBU

#### 2. RESPONSE DETAILS

CALL 999  AT HOME  AT WORK

INJURY BY FALL  SLIP/TWIST  COLLISION

#### 3. CONDITION CODES

HEAD INJURY  NECK INJURY  CHEST INJURY

#### 4. PRIMARY SURVEY

CONSCIOUS  UNRESPONDING  UNRELIABLE

RESPIRATIONS  CIRCULATION  CAP PERFILL

#### 5. OBSERVATIONS

| TIME  | PULSE | BP | RR | TEMP | GLUCOSE | SAO2 | NEWS |
|-------|-------|----|----|------|---------|------|------|
| 08:00 |       |    |    |      |         |      |      |
| 08:15 |       |    |    |      |         |      |      |
| 08:30 |       |    |    |      |         |      |      |
| 08:45 |       |    |    |      |         |      |      |

#### 6. OBSTETRICS

GESTATION  TIME DELIVERED  TIME CLAMP CUT

#### 7. RELEVANT MEDICAL INFORMATION

ALLERGIES

#### 8. REFERRAL FORMS

URGENT  DAY  NIGHT

#### 9. REFUSAL OF TREATMENT

COMPLETED BY FPM  REFUSAL OF TREATMENT/TRANSPORT FORM COMPLETED

#### 10. RTA INFORMATION

VEHICLE TYPE  ROAD TYPE

WINDSHIELD  PASSENGER SIDE

DRIVER  FRONT SEAT

#### 11. INJURY INFORMATION

HEAD  NECK  CHEST

ARM  LEG

BLUNT FORCE  PENETRATING

#### 12. TREATMENT BEFORE AMBULANCE ARRIVED

WOUND TREATMENT  BURN TREATMENT

BLINDFOLDED  HELICOPTER

#### 13. MONITOR

HR  RR  SpO2

BP  TEMP

#### 14. IMMOBILISATION

SPINE BOARD  COLLAR

#### 15. OTHER INTERVENTION

IV  O2

#### 16. AIRWAY & BREATHING

O2  VENTILATOR

#### 17. CIRCULATION

IV  DOPAMINE

#### 18. INTUBATION

TYPE OF INTUBATION

#### 19. CARDIAC ARREST

TYPE OF ARREST

#### 20. MEDICINE ADMINISTRATION

| TIME | MEDICINE | DRUG CODE | ROUTE | AMOUNT |
|------|----------|-----------|-------|--------|
|      |          |           |       |        |
|      |          |           |       |        |

#### 21. NARRATIVE / NON-COMPLIANCE

XXXXXXXXXXXXXXXXXXXXXXXXXXXXXXXXXXXXXXXXXXXXXXXXXXXX

#### 22. STAFF SIGNATURES

| NAME | SIGNATURE |
|------|-----------|
|      |           |
|      |           |
